# Supplementary material for: Microarray-Based Maps of Copy-Number Variant Regions in European and Sub-Saharan Populations
Source: PLoS One. 2010 Dec 16;5(12):e15246. doi: 10.1371/journal.pone.0015246 (PMC3002949; doi:10.1371/journal.pone.0015246)
Supplement: Table S2 — (XLSX) [file pone.0015246.s004.xlsx]

## Sheet: Tabelle1
Detailed overview of overlapping CNV events
Nimblegen 385K aCGH and Affymetrix Genome-Wide Human SNP Array 6.0
subject1	subject2	aCGH	AFFYMETRIX	overlap:aCGH->AFFYMETRIX	overlap:AFFYMETRIX->aCGH
SAMPLE_1_aCGH	SAMPLE_1_SNP_6.0	12	25	2	2
SAMPLE_2_aCGH	SAMPLE_2_SNP_6.0	26	53	9	9
SAMPLE_3_aCGH	SAMPLE_3_SNP_6.0	35	34	2	2
SAMPLE_4_aCGH	SAMPLE_4_SNP_6.0	29	35	6	5
SAMPLE_5_aCGH	SAMPLE_5_SNP_6.0	31	26	5	4
SAMPLE_6_aCGH	SAMPLE_6_SNP_6.0	42	37	8	8
SAMPLE_7_aCGH	SAMPLE_7_SNP_6.0	36	40	8	8
SAMPLE_8_aCGH	SAMPLE_8_SNP_6.0	28	55	10	9
SAMPLE_9_aCGH	SAMPLE_9_SNP_6.0	25	41	5	5
		264	346	55	52
Illumina 1M-Duo BeadChip and Affymetrix Genome-Wide Human SNP Array 6.0 - SWISS
subject1	subject2	ILLUMINA	AFFYMETRIX	overlap:ILL->Affy	overlap:Affy->ILL
SAMPLE_ILLUMINA_SWISS_1	SAMPLE_AFFY_SNP_6.0_SWISS_1	64	35	21	21
SAMPLE_ILLUMINA_SWISS_2	SAMPLE_AFFY_SNP_6.0_SWISS_2	46	55	14	14
SAMPLE_ILLUMINA_SWISS_3	SAMPLE_AFFY_SNP_6.0_SWISS_3	54	55	22	19
SAMPLE_ILLUMINA_SWISS_4	SAMPLE_AFFY_SNP_6.0_SWISS_4	68	25	11	11
SAMPLE_ILLUMINA_SWISS_5	SAMPLE_AFFY_SNP_6.0_SWISS_5	74	45	20	15
SAMPLE_ILLUMINA_SWISS_6	SAMPLE_AFFY_SNP_6.0_SWISS_6	81	30	17	17
SAMPLE_ILLUMINA_SWISS_7	SAMPLE_AFFY_SNP_6.0_SWISS_7	100	119	19	16
		487	364	124	113
Illumina 1M-Duo BeadChip and Affymetrix Genome-Wide Human SNP Array 6.0 - RWANDA
subject1	subject2	ILLUMINA	AFFYMETRIX	overlap:ILL->Affy	overlap:Affy->ILL
SAMPLE_ILLUMINA_RWANDA_1	SAMPLE_AFFY_SNP_6.0_RWANDA_1	59	67	28	28
SAMPLE_ILLUMINA_RWANDA_2	SAMPLE_AFFY_SNP_6.0_RWANDA_2	95	66	36	33
SAMPLE_ILLUMINA_RWANDA_3	SAMPLE_AFFY_SNP_6.0_RWANDA_3	78	56	31	28
SAMPLE_ILLUMINA_RWANDA_4	SAMPLE_AFFY_SNP_6.0_RWANDA_4	80	52	34	32
SAMPLE_ILLUMINA_RWANDA_5	SAMPLE_AFFY_SNP_6.0_RWANDA_5	52	60	30	28
SAMPLE_ILLUMINA_RWANDA_6	SAMPLE_AFFY_SNP_6.0_RWANDA_6	79	71	19	21
		443	372	178	170
compare_cnv.pl results for comparisons between different microarrays:
aCGH arrays were analyzed using the wuHMM algorithm, Illumina and Affymetrix arrays were processed with the PennCNV algorithm.
Leftsided: all CNV events that were detected in total. Rightsided: overlaps between methods.
